# Supplementary material for: The BET Inhibitor JQ1 Augments the Antitumor Efficacy of Gemcitabine in Preclinical Models of Pancreatic Cancer
Source: MDPI journal article supplement (doi:10.3390/cancers13143470), 2021-07-11
Supplement: s1 [file s1]

# The BET inhibitor JQ1 augments the antitumor efficacy of gemcitabine in preclinical models of pancreatic cancer

Aubrey L. Miller, Patrick L. Garcia, Samuel C. Fehling , Tracy L. Gamblin ,  
Rebecca B. Vance , Leona N. Council, Dongquan Chen, Eddy S. Yang, Robert C.  
A. M. van Waardenburg, and Karina J. Yoon

## Supplementary Materials

**Figure S1.** JQ1 + gemcitabine inhibits tumor growth of PA4 and PA16 PDX models of PDAC *in vivo*.

**Figure S2.** JQ1 and JQ1 + gemcitabine induce tumor cell differentiation *in vivo*.

**Figure S3.** Pathways and gene products upregulated by JQ1 + gemcitabine *in vivo* in PA4 or PA16 PDX models of PDAC.

**Figure S4.** The whole uncropped immunoblot images with densitometry intensity/reading analysis of Figure 2D.

**Figure S5.** The whole uncropped immunoblot images with densitometry intensity/reading analysis of Figure 2E.

**Table S1.** Primers used to perform qRT-PCR.

**Table S2.** Eight gene products downregulated *in vivo* by JQ1 + gemcitabine compared to vehicle control in PA4 and PA16 PDAC tumors.

**Table S3.** Gene products in the LXR/RXR activation pathway that are altered by JQ1 + gemcitabine compared to vehicle control in PA4 and PA16 tumors.

**Excel S1.** RNA-seq data for up-or down-regulated genes by JQ1 + gemcitabine compared to control.

**A**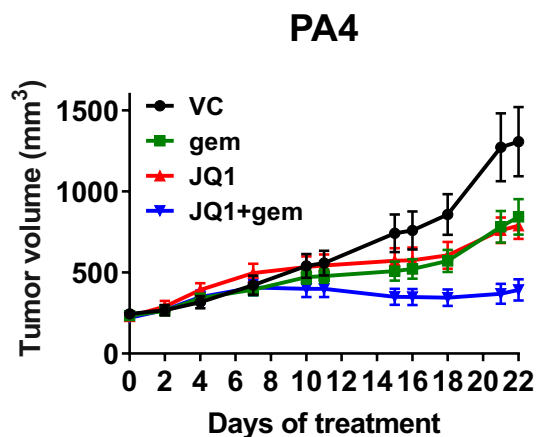**B**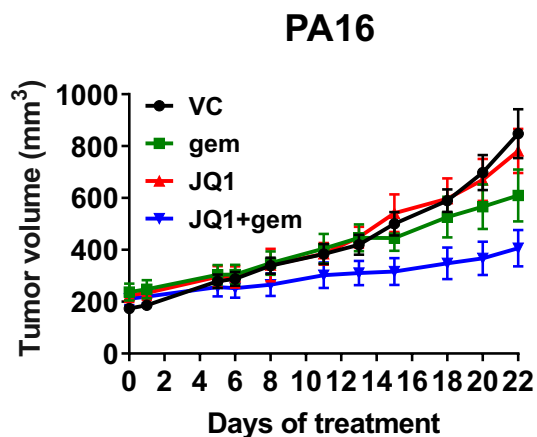

**Figure S1. JQ1 + gemcitabine inhibits tumor growth of PA4 (A) and PA16 (B) patient-derived xenograft models of PDAC *in vivo*.** Tumor bearing mice were treated with Vehicle Control (VC), JQ1 (50mg/kg daily), gemcitabine (gem; 100mg/kg weekly), or JQ1 + gemcitabine (JQ1+gem) for 21 days. Data are presented as mean volume  $\pm$  SEM.

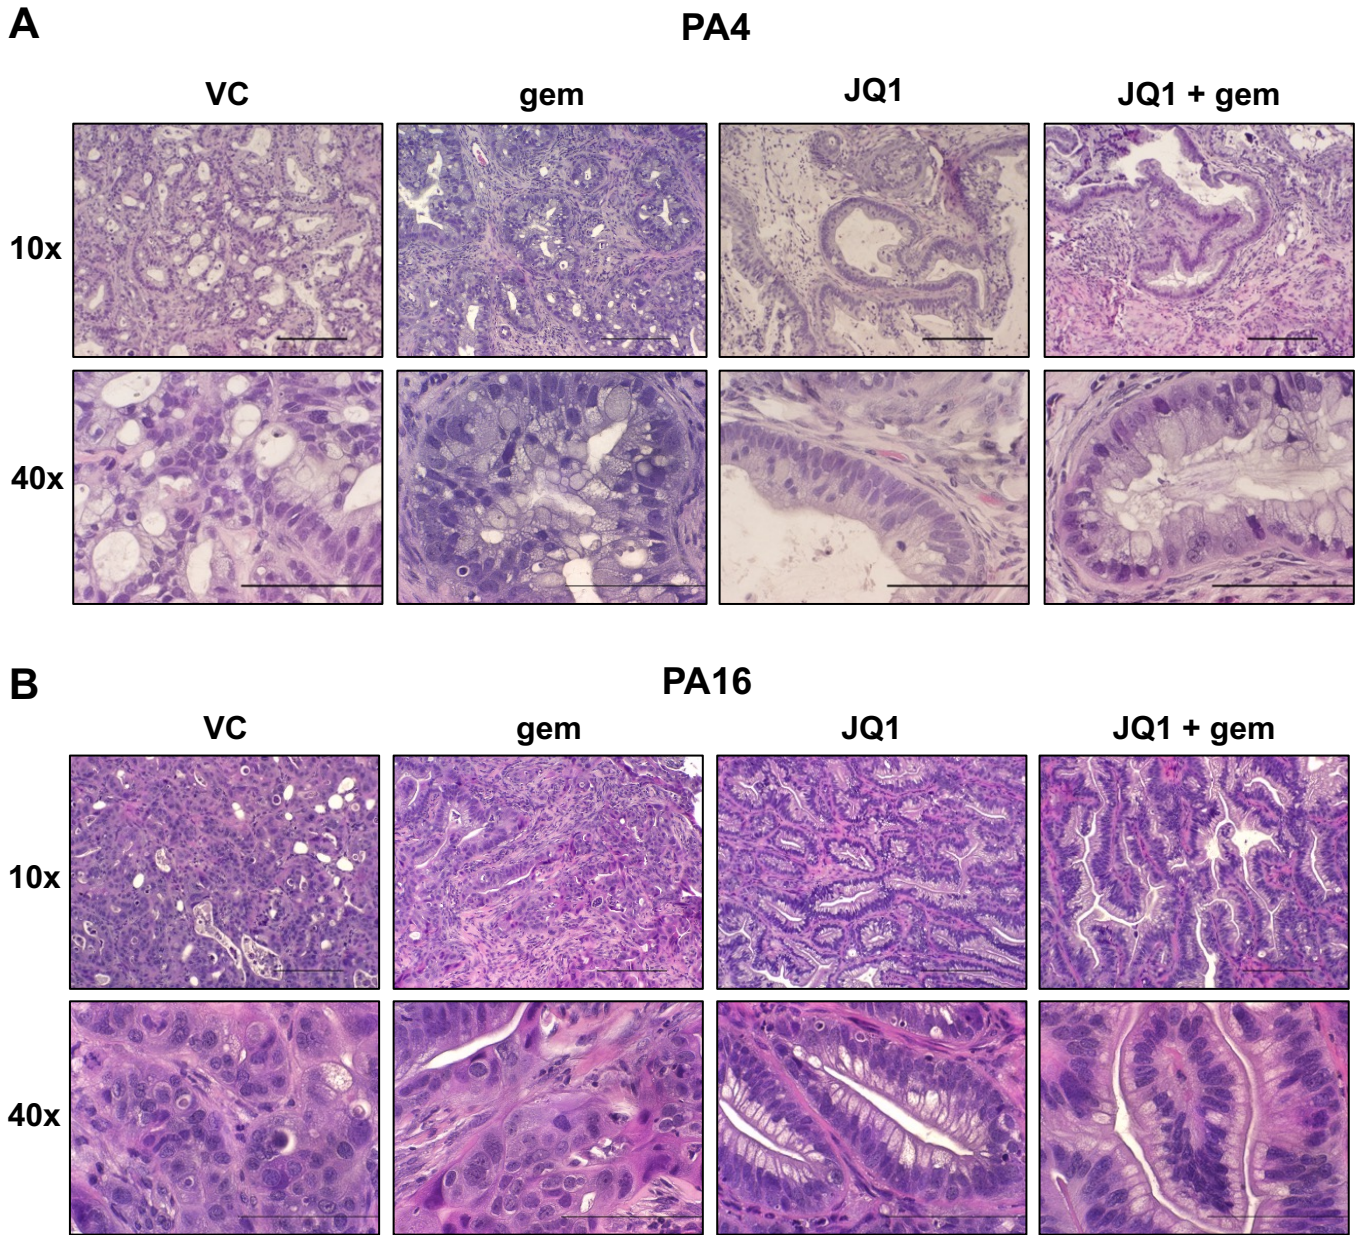

**Figure S2. JQ1 and JQ1 + gemcitabine induce tumor cell differentiation *in vivo*.** (A) PA4 and (B) PA16 tumors exposed to JQ1 or JQ1 + gemcitabine *in vivo* show a more well differentiated morphology than untreated (VC) tumors. Treated tumors had intact nuclear polarity, less nuclear stratification and pleomorphism, compared to untreated tumors. Scale bar 10x = 20  $\mu$ m and 40x = 10  $\mu$ m.

**A**

| PA4                                              |         | PA16                                        |         |
|--------------------------------------------------|---------|---------------------------------------------|---------|
| Ingenuity Canonical Pathways                     | P-value | Ingenuity Canonical Pathways                | P-value |
| Taurine Biosynthesis                             | 2.5e-3  | Aryl Hydrocarbon Receptor Signaling         | 1.5e-5  |
| L-Cysteine Degradation                           | 5.0e-3  | Inhibition of Matrix Metalloproteases       | 1.5e-5  |
| Pentose Phosphate Pathway (Non-oxidative Branch) | 7.5e-3  | Bladder Cancer Signaling                    | 3.5e-5  |
| Pentose Phosphate Pathway                        | 1.2e-2  | RAR Activation                              | 1.0e-4  |
| Endocannabinoid Neuronal Synapse Pathway         | 1.5e-2  | Glioblastoma Multiforme Signaling           | 1.5e-4  |
| Extrinsic Prothrombin Activation Pathway         | 2.0e-2  | Tumor Microenvironment Pathway              | 2.1e-4  |
| CREB Signaling in Neurons                        | 3.9e-2  | Senescence Pathway                          | 2.9e-4  |
| Coagulation System                               | 4.3e-2  | Xenobiotic Metabolism CAR Signaling Pathway | 3.3e-4  |
| Superpathway of Methionine Degradation           | 4.6e-2  | Pancreatic Adenocarcinoma Signaling         | 3.9e-4  |
| Intrinsic Prothrombin Activation Pathway         | 5.1e-2  | Atherosclerosis Signaling                   | 4.8e-4  |

**B**

|    | PA4           |                         | PA16      |                         |
|----|---------------|-------------------------|-----------|-------------------------|
|    | Gene ID       | Fold change (VC/JQ+gem) | Gene ID   | Fold change (VC/JQ+gem) |
| 1  | DNAJC25-GNG10 | 25134.3                 | ABCB1     | 18.6399                 |
| 2  | LOC100101148  | 168.865                 | NOTUM     | 18.1146                 |
| 3  | FGB           | 98.9564                 | LINC00513 | 11.3258                 |
| 4  | TMIGD2        | 13.1942                 | LINC02365 | 9.59563                 |
| 5  | ZNF256        | 11.5449                 | CLDN18    | 9.42094                 |
| 6  | ART1          | 9.89564                 | ATF3      | 8.0513                  |
| 7  | FAM172BP      | 8.24637                 | LYZ       | 7.67766                 |
| 8  | CDO1          | 8.24637                 | PTGIS     | 7.34076                 |
| 9  | LOC100507389  | 8.24637                 | THRIL     | 6.82499                 |
| 10 | NPY6R         | 6.5971                  | SCARA3    | 6.48858                 |

**Figure S3. Pathways and gene products upregulated by JQ1 + gemcitabine *in vivo* in PA4 or PA16 models of PDAC. (A)** Pathways upregulated by JQ1 + gemcitabine *in vivo* in PA4 or PA16 PDX models of PDAC. **(B)** Ten gene products upregulated *in vivo* by JQ1 + gemcitabine compared to vehicle controls (VC) in PA4 or PA16 tumors.

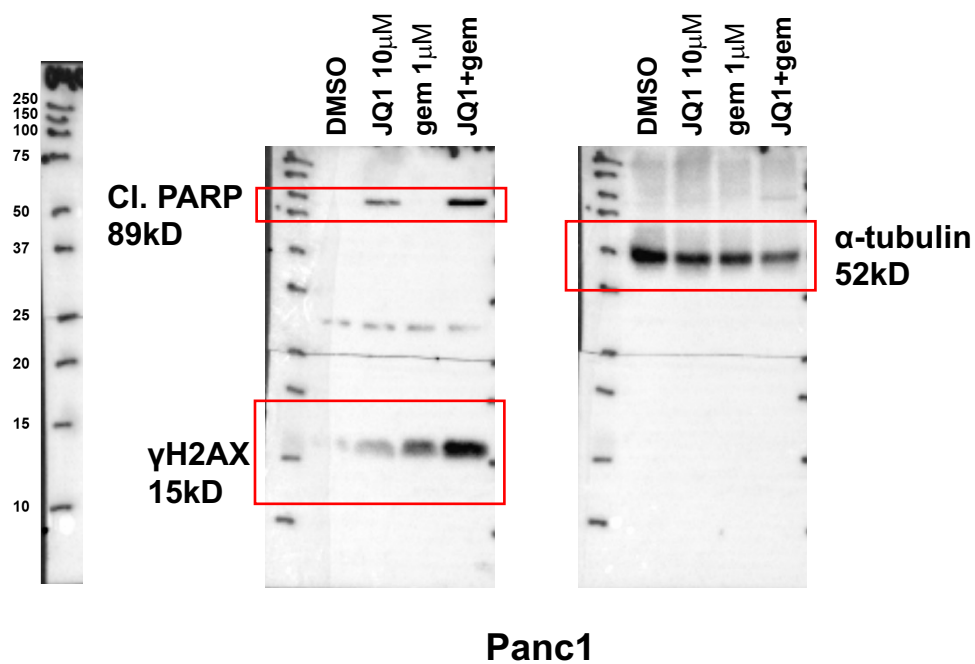

| Panc1 Densitometry |           |          |          |
|--------------------|-----------|----------|----------|
|                    | α-tubulin | γH2AX    | CI. PARP |
| DMSO               | 33449.10  | 551.33   | 594.96   |
| JQ1                | 22611.87  | 10528.31 | 7754.66  |
| gem                | 25234.66  | 21964.03 | 618.38   |
| JQ1+gem            | 21589.11  | 40968.66 | 20107.10 |

Figure S4. The whole uncropped immunoblot images with densitometry intensity/reading analysis of Figure 2D.

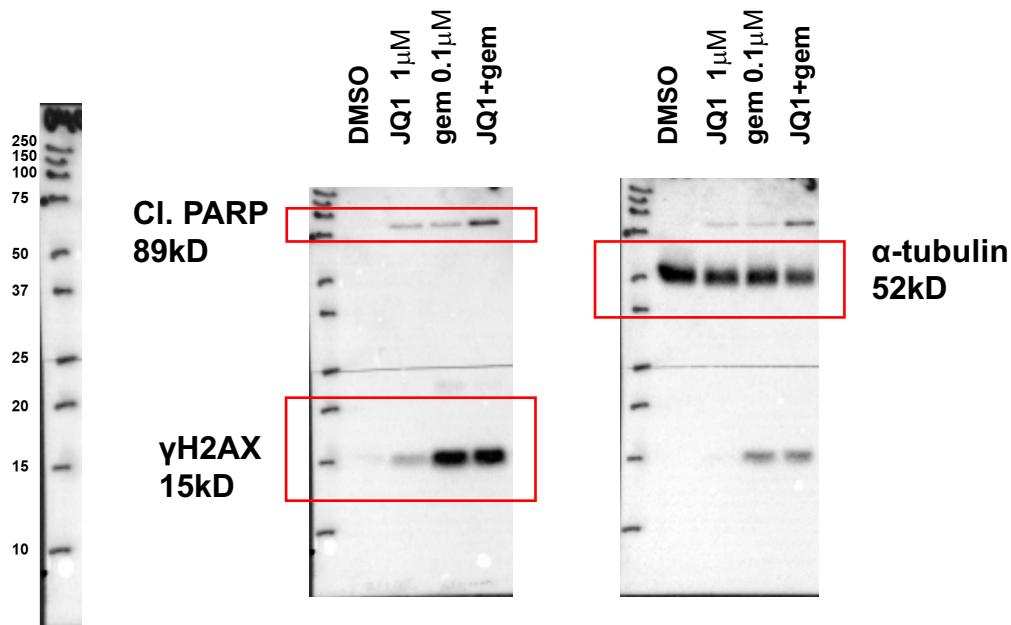

### MiaPaCa2

| MiaPaCa2 Densitometry |           |          |          |
|-----------------------|-----------|----------|----------|
|                       | α-tubulin | γH2AX    | CI. PARP |
| DMSO                  | 59905.3   | 1395.52  | 416.36   |
| JQ1                   | 50889.33  | 9118.80  | 5497.43  |
| gem                   | 53591.35  | 38898.63 | 5588.66  |
| JQ1+gem               | 45363.88  | 42292.24 | 19023.47 |

Figure S5. The whole uncropped immunoblot images with densitometry intensity/reading analysis of Figure 2E.

|         |        |                                                                   |
|---------|--------|-------------------------------------------------------------------|
| Primers | HMGCS2 | Fwd 5'-AGAGCTTCTCCCCGTGAATC-3'<br>Rev 5'-CCATAAGCCCAGGACAGTGA-3'  |
|         | APOC1  | Fwd 5'-TGGTTCTGTCGATCGTCTTG-3'<br>Rev 5'-TGTCCCTCCAGTGTGTTTCCA-3' |
|         | GAPDH  | Fwd 5'-AACATCATCCCTGCTTCCAC-3'<br>Rev 5'-GACCACCTGGTCCTCAGTGT-3'  |

**Table S1. Primer sets used to perform qRT-PCR.**

|   |               | Fold change (VC/JQ + gem) |          |         |
|---|---------------|---------------------------|----------|---------|
|   | Gene ID       | PA4                       | PA16     | Average |
| 1 | <i>HMGCS2</i> | -5.82927                  | -5.91705 | -5.8732 |
| 2 | <i>APOC1</i>  | -8.19664                  | -3.06895 | -5.6328 |
| 3 | <i>CGBS</i>   | -7.18476                  | -3.20816 | -5.1965 |
| 4 | <i>NEGR1</i>  | -2.30404                  | -7.92216 | -5.1131 |
| 5 | <i>PNCK</i>   | -6.14989                  | -3.21169 | -4.6808 |
| 6 | <i>TAC3</i>   | -5.65906                  | -2.91972 | -4.2894 |
| 7 | <i>ARL4C</i>  | -4.08678                  | -3.89347 | -3.9901 |
| 8 | <i>GBP4</i>   | -2.29105                  | -3.51424 | -2.9026 |

**Table S2. Eight gene products downregulated *in vivo* by JQ1 + gemcitabine compared to vehicle controls (VC) in PA4 and PA16 tumors.**



| LXR/RXR activation pathway genes altered<br>by JQ1 + gemcitabine <i>in vivo</i> |      |      |
|---------------------------------------------------------------------------------|------|------|
|                                                                                 | PA4  | PA16 |
| <i>APOC1</i>                                                                    | -8.2 | -3.1 |
| <i>APOC2</i>                                                                    | -3.9 | -1.1 |
| <i>APOE</i>                                                                     | -1.8 | -4.4 |
| <i>AGT</i>                                                                      | -1.3 | -2.6 |
| <i>ALB</i>                                                                      | -5.6 | 1    |
| <i>CD14</i>                                                                     | -4.9 | -2.2 |
| <i>ILIR2</i>                                                                    | -3.1 | -3   |
| <i>PLTP</i>                                                                     | -4.6 | -2.6 |
| <i>PON1</i>                                                                     | -1.8 | -3.2 |
| <i>SERPINF1</i>                                                                 | -1.1 | -2.2 |
| <i>TLR3</i>                                                                     | -2.5 | -1.4 |
| <i>TLR4</i>                                                                     | -3.4 | 1    |
| <i>TTR</i>                                                                      | 1    | -3.4 |

**Table S3. Gene products in the LXR/RXR activation pathway that are altered by JQ1+gemcitabine compared to vehicle controls in PA4 and PA16 tumors.**
